# Supplementary material for: Strong absorber vs. strong emitter in extended π-conjugated systems: a carbo-benzene – benzothiadiazole chromophore
Source: Royal Society of Chemistry journal article supplement (doi:10.1039/d2nj00569g), 2022-01-01
Supplement: d2nj00569g1.pdf [file d2nj00569g1.pdf]

***New Journal of Chemistry***

**SUPPLEMENTARY INFORMATION**

**Strong absorber vs strong emitter in extended  $\pi$ -conjugated systems:  
a *carbo*-benzene - benzothiadiazole chromophore**

Luis Loeza,<sup>a,b</sup> Valérie Maraval,<sup>\*b</sup> Alix Saquet,<sup>b</sup> Gabriel Ramos-Ortiz,<sup>c</sup>  
Remi Chauvin,<sup>\*b</sup> Norberto Farfán<sup>\*a</sup>

<sup>a</sup>*Facultad de Química, Departamento de Química Orgánica, Universidad Nacional Autónoma de México, 04510 Ciudad de México, México.*

<sup>b</sup>*LCC-CNRS, Université de Toulouse, CNRS, UPS, Toulouse, France.*

<sup>c</sup>*Centro de Investigaciones en Óptica A.C., Apdo. Postal 1-948, 37000, León, Gto, Mexico*

**Content**

**1- <sup>1</sup>H and <sup>13</sup>C NMR spectra**

**2- Optical properties**

**3- DFT calculations**

# 1- <sup>1</sup>H and <sup>13</sup>C spectra

<sup>1</sup>H NMR spectrum of **2** (CDCl<sub>3</sub>, 400.16 MHz)

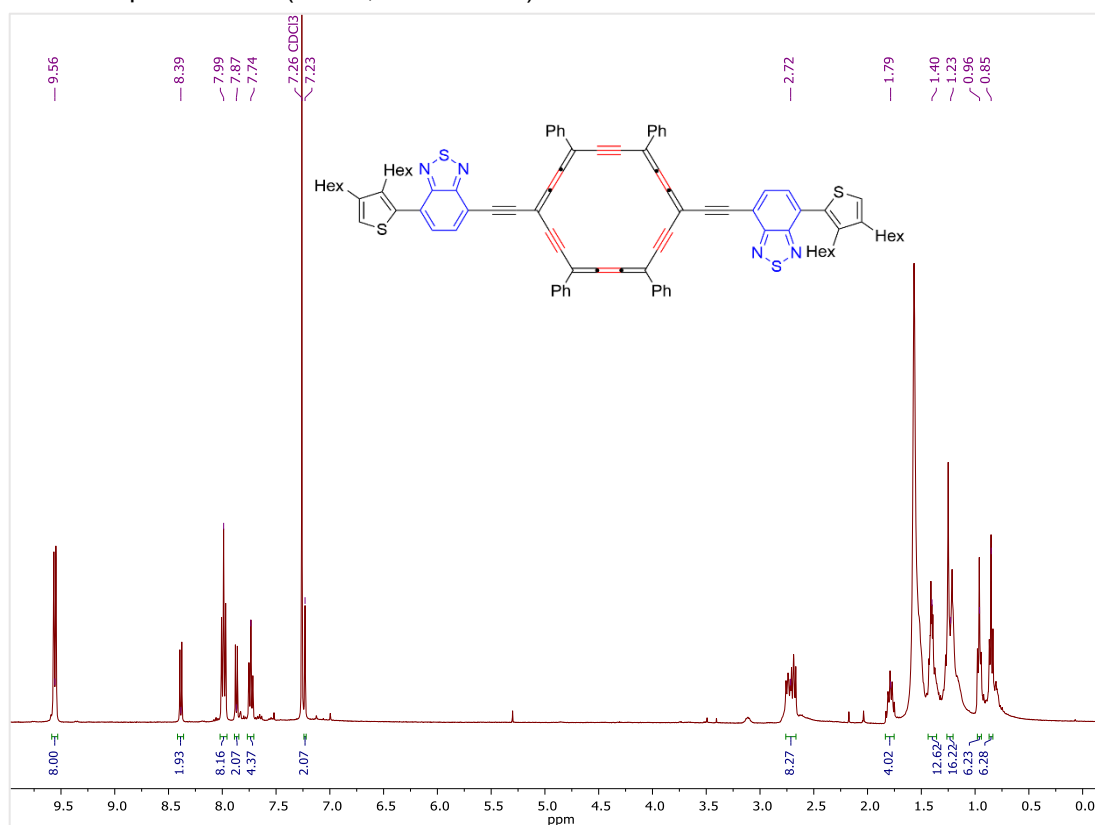

<sup>13</sup>C NMR spectrum of **2** (CDCl<sub>3</sub>, 100.63 MHz)

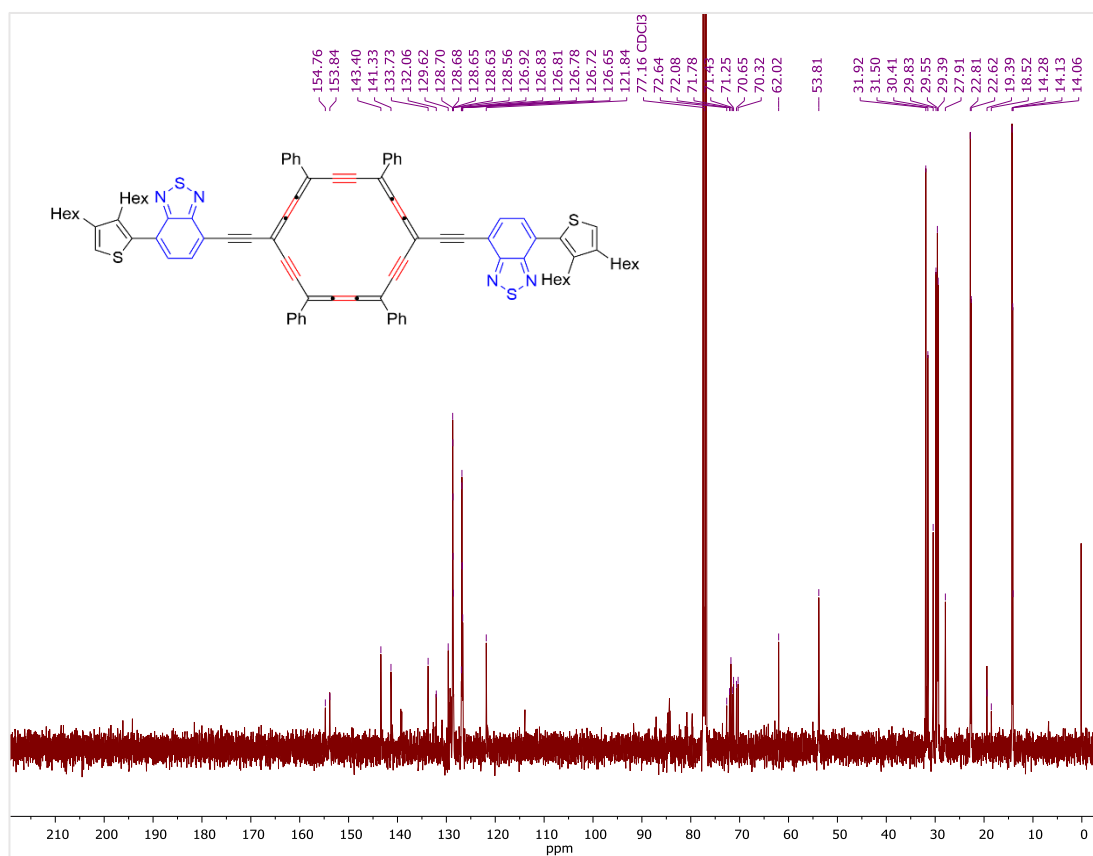

$^1\text{H}$  NMR spectrum of **4** ( $\text{CDCl}_3$ , 400.16 MHz)

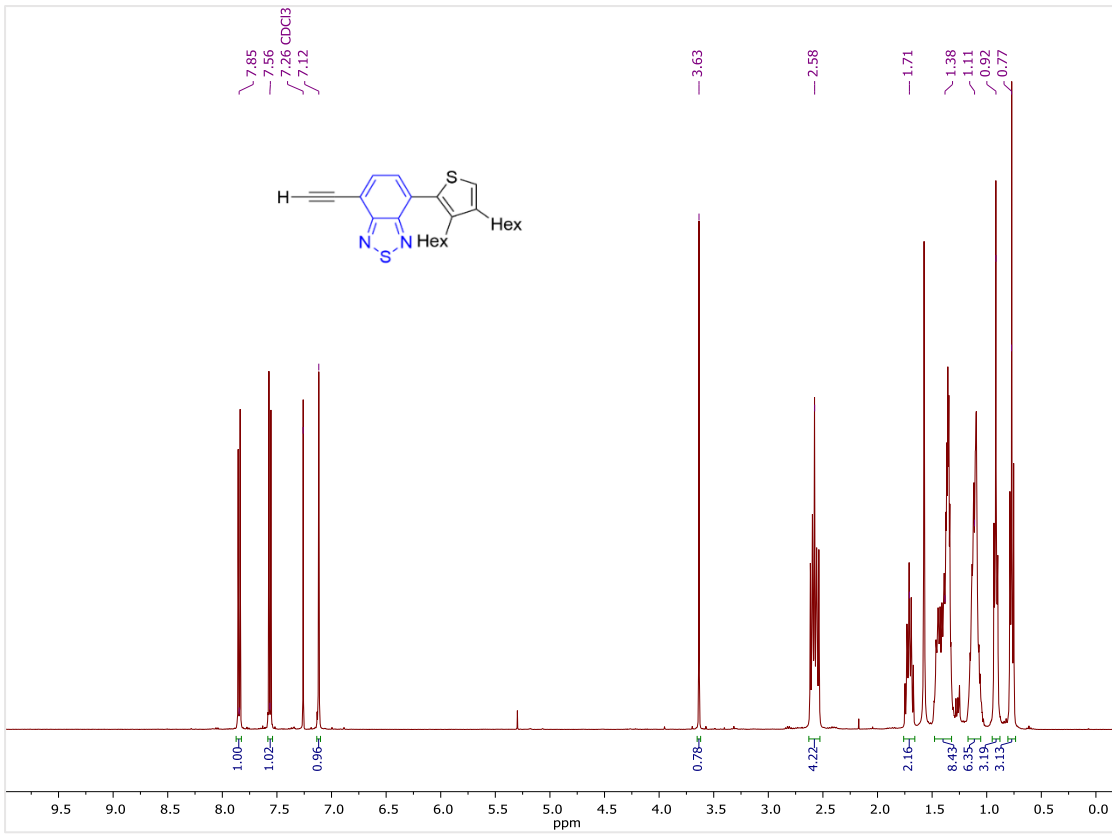

$^{13}\text{C}$  NMR spectrum of **4** ( $\text{CDCl}_3$ , 100.63 MHz)

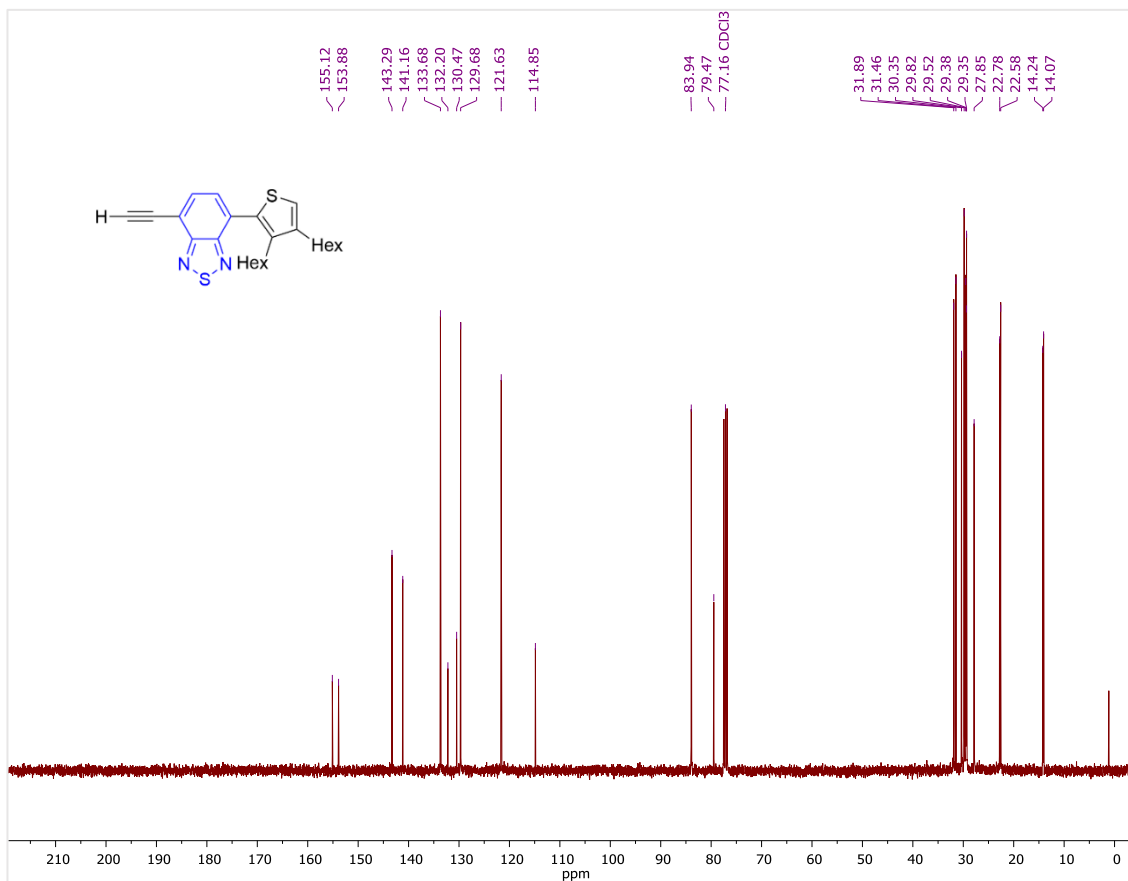

$^1\text{H}$  NMR spectrum of **6** ( $\text{CDCl}_3$ , 400.16 MHz)

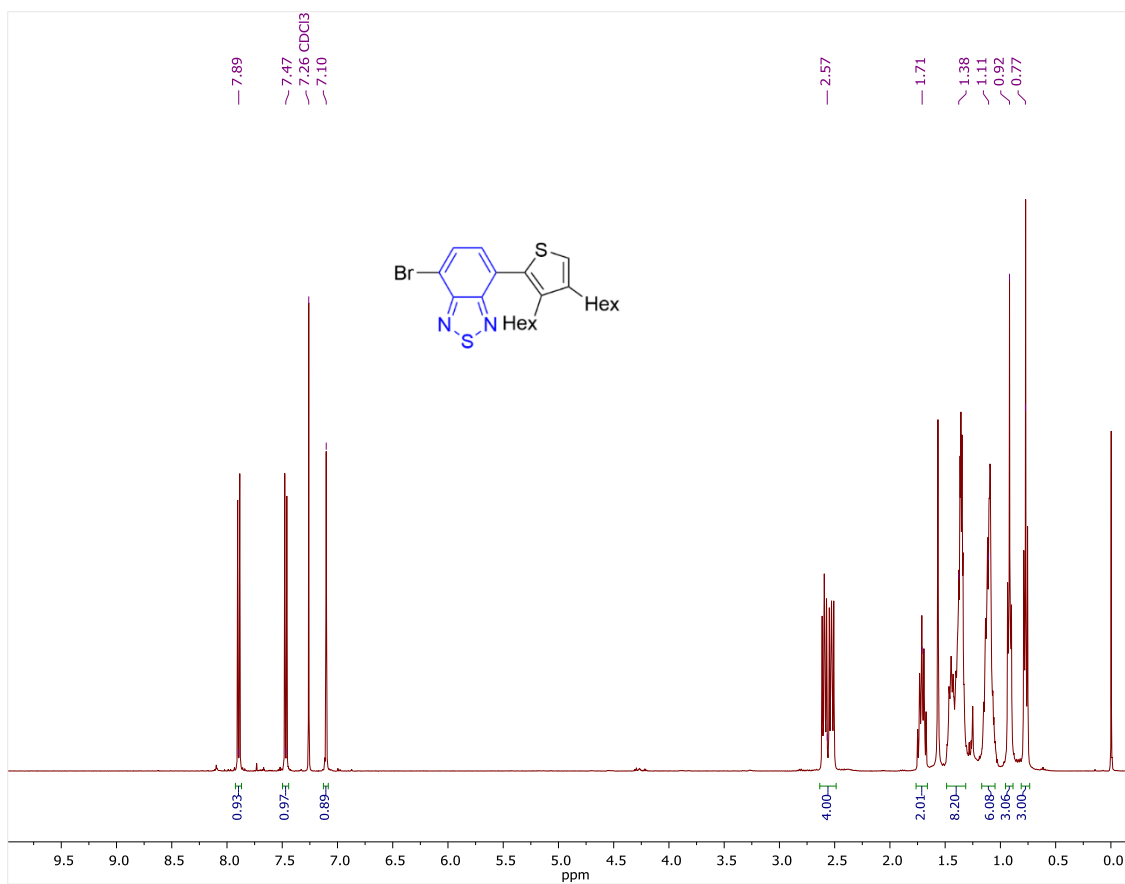

$^{13}\text{C}$  NMR spectrum of **6** ( $\text{CDCl}_3$ , 100.63 MHz)

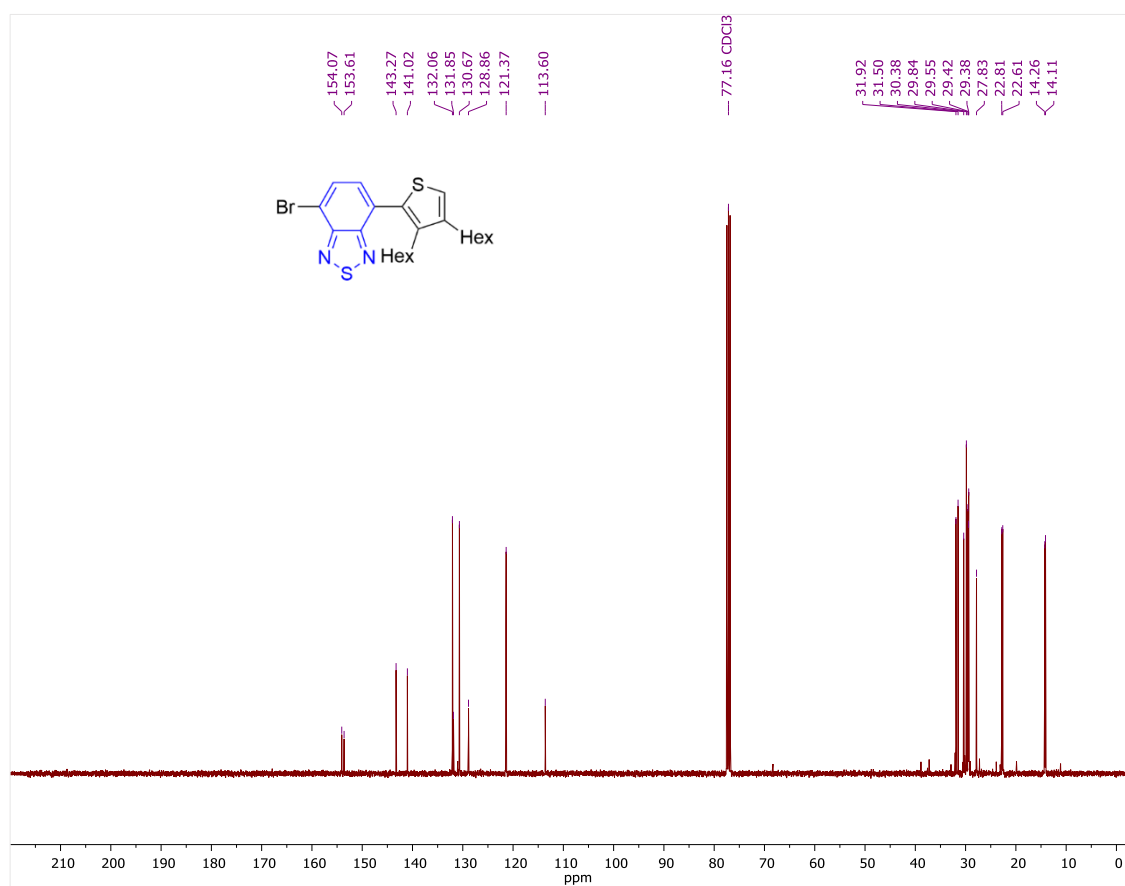

$^1\text{H}$  NMR spectrum of **7** ( $\text{CDCl}_3$ , 400.16 MHz)

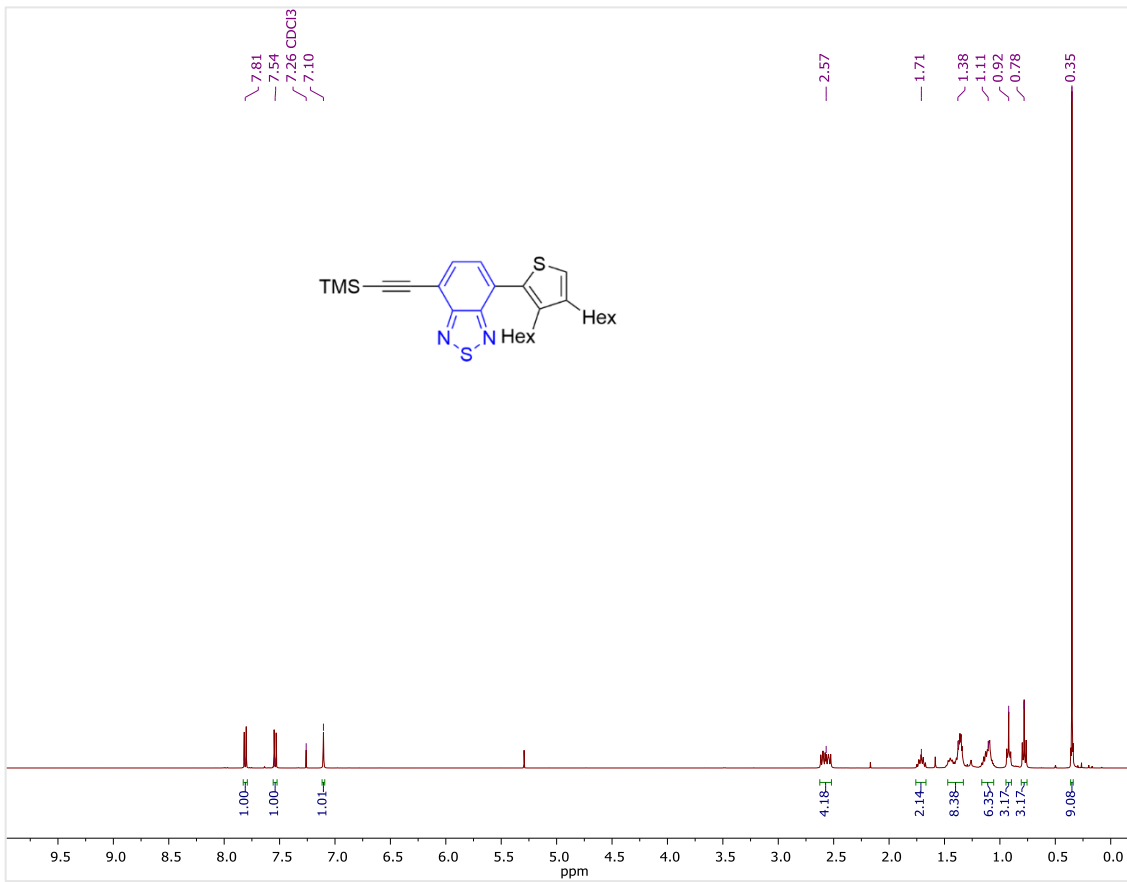

$^{13}\text{C}$  NMR spectrum of **7** ( $\text{CDCl}_3$ , 100.63 MHz)

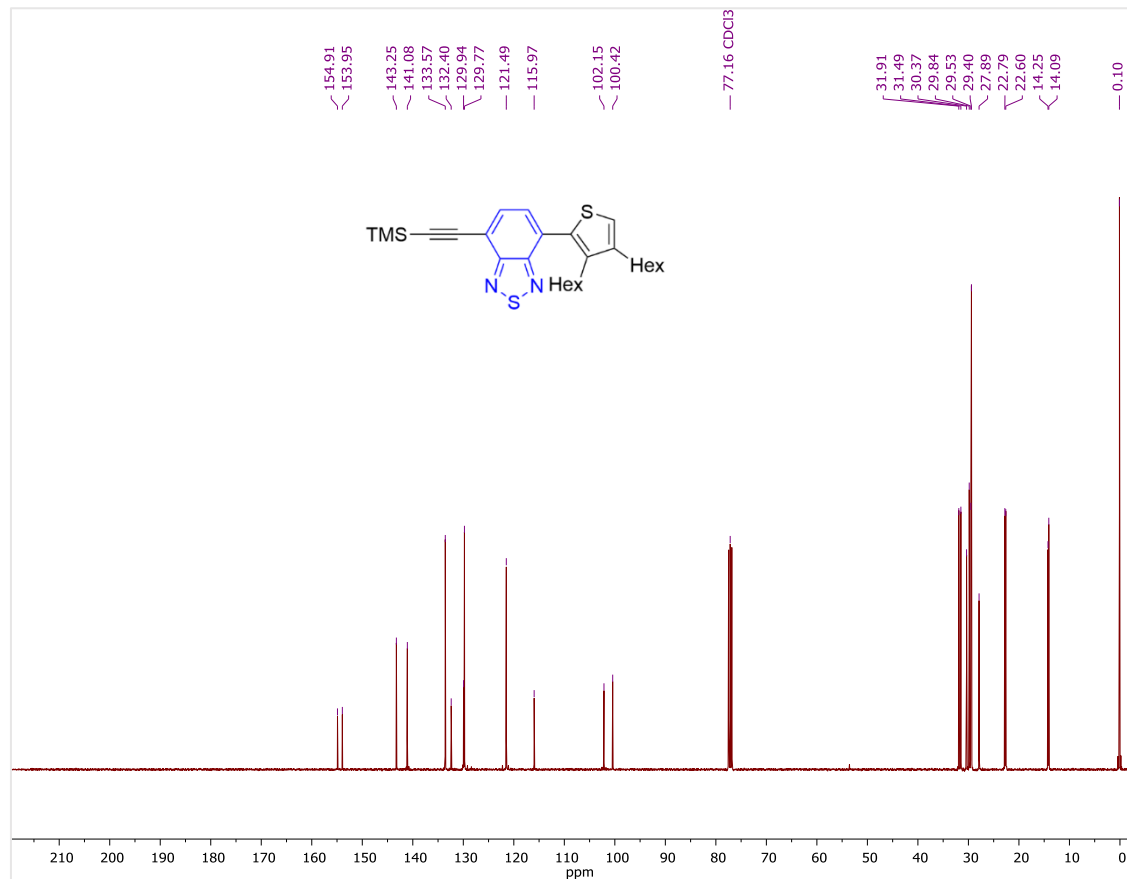

<sup>1</sup>H NMR spectrum of **8** (CDCl<sub>3</sub>, 400.16 MHz)

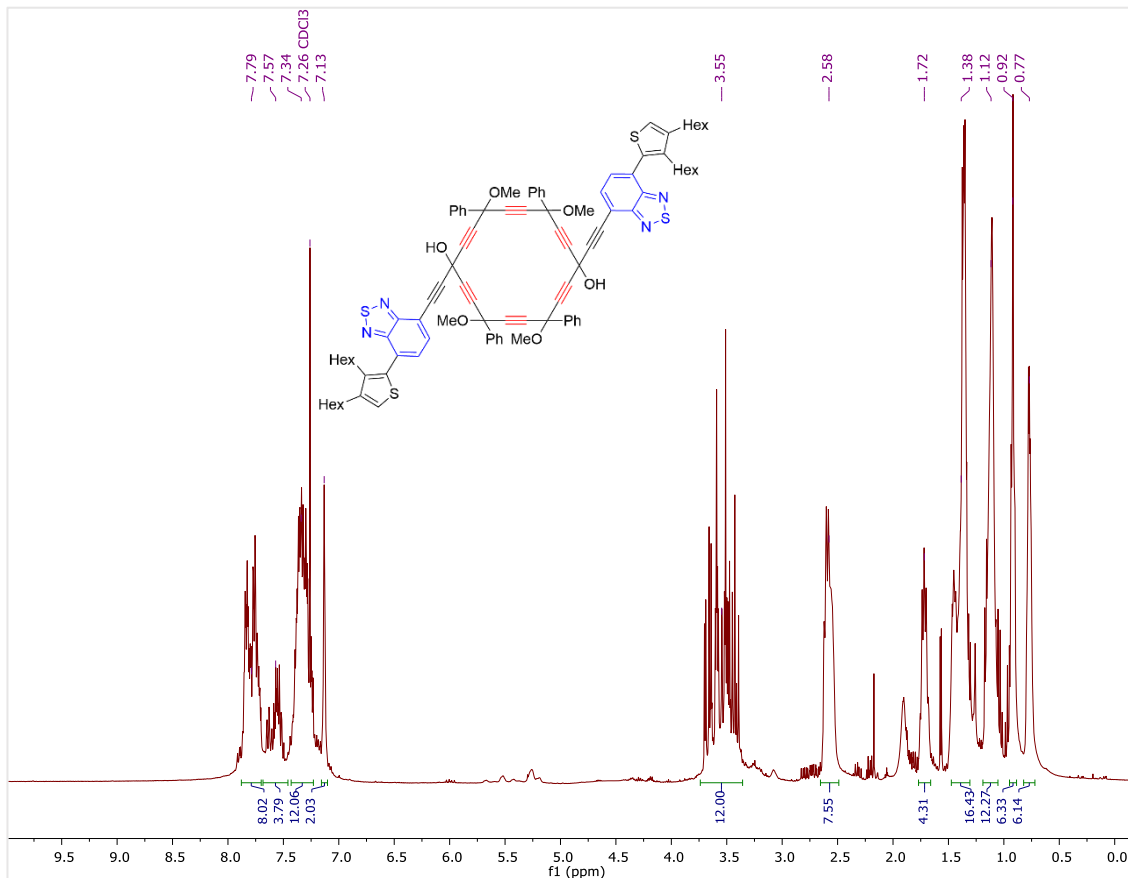

<sup>13</sup>C NMR spectrum of **8** (CDCl<sub>3</sub>, 100.63 MHz)

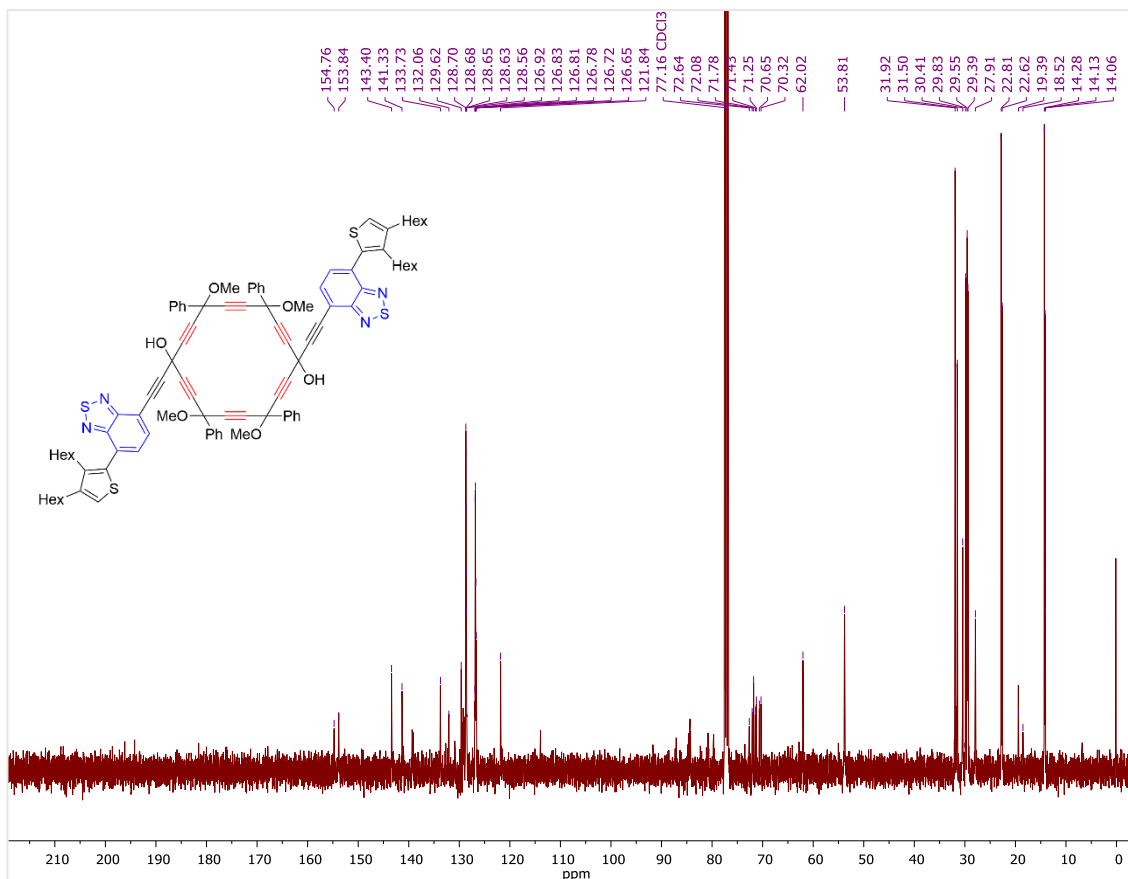

$^1\text{H}$  NMR spectrum of **9** ( $\text{CDCl}_3$ , 400.16 MHz)

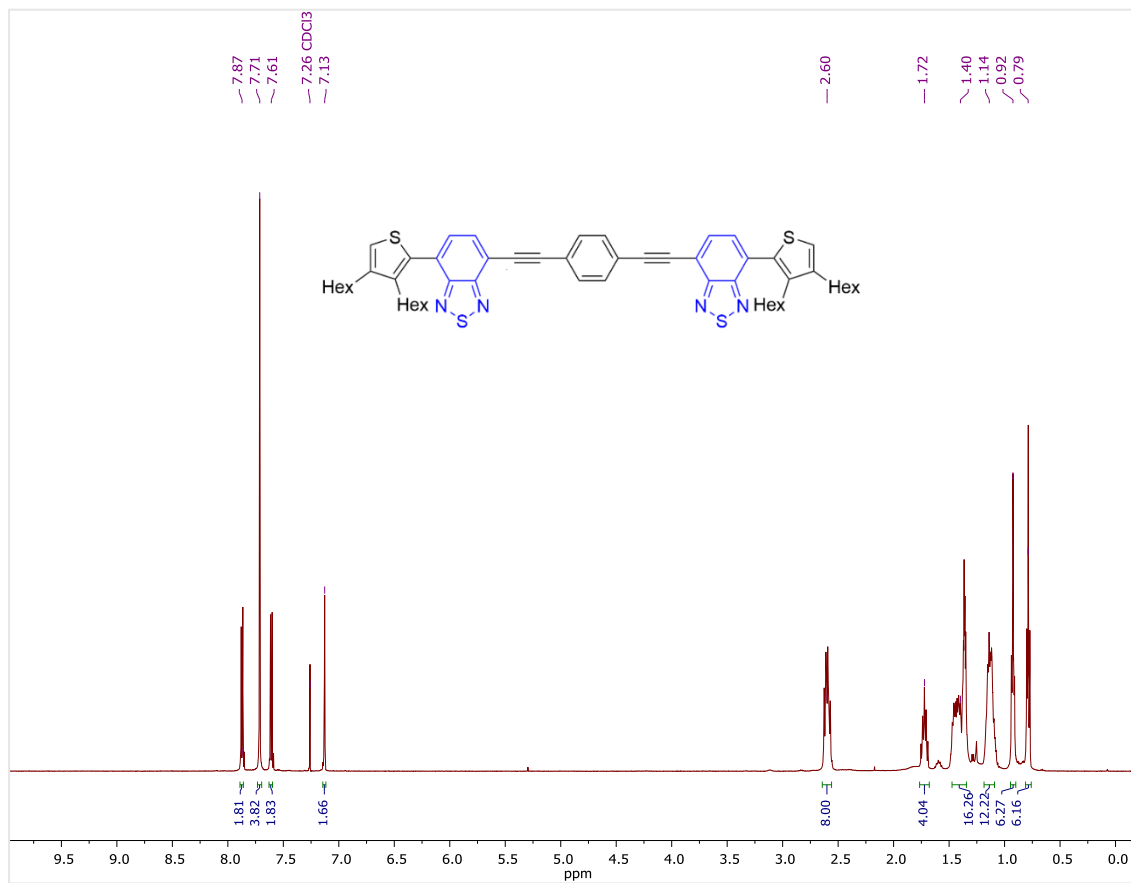

$^{13}\text{C}$  NMR spectrum of **9** ( $\text{CDCl}_3$ , 100.63 MHz)

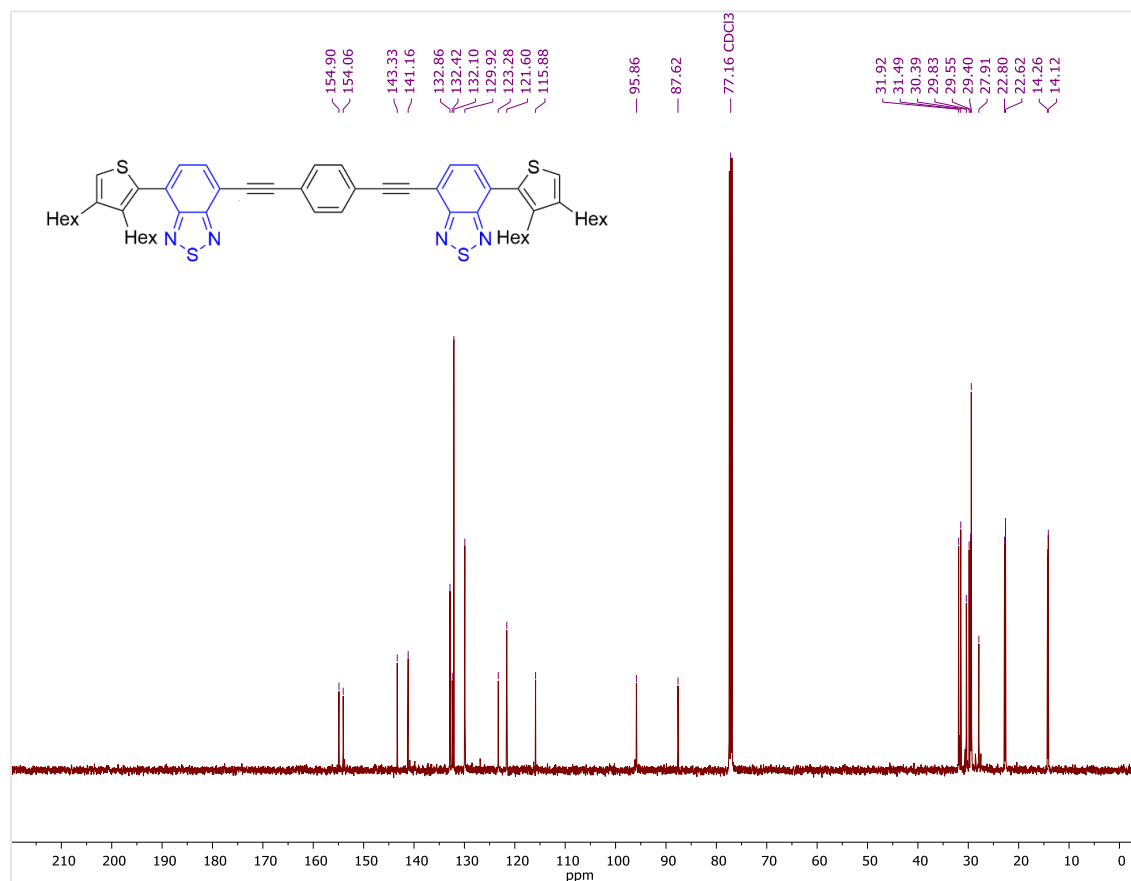

## 2- Optical properties

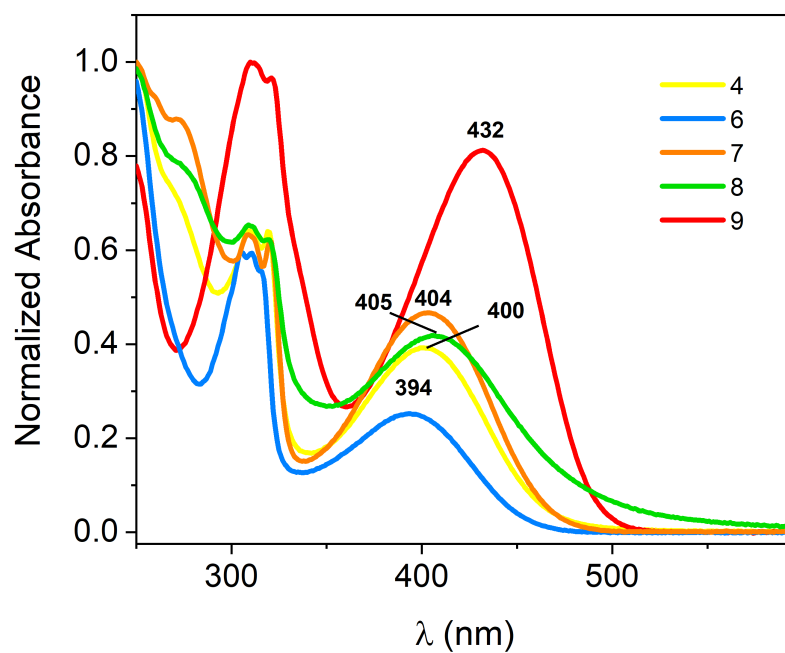

**Fig. S1.** Absorption spectra of the BTD-containing synthetic intermediates **4**, **6**, **7**, **8** and parent molecule **9** (see Schemes 2-3 in the main text) in chloroform solution.

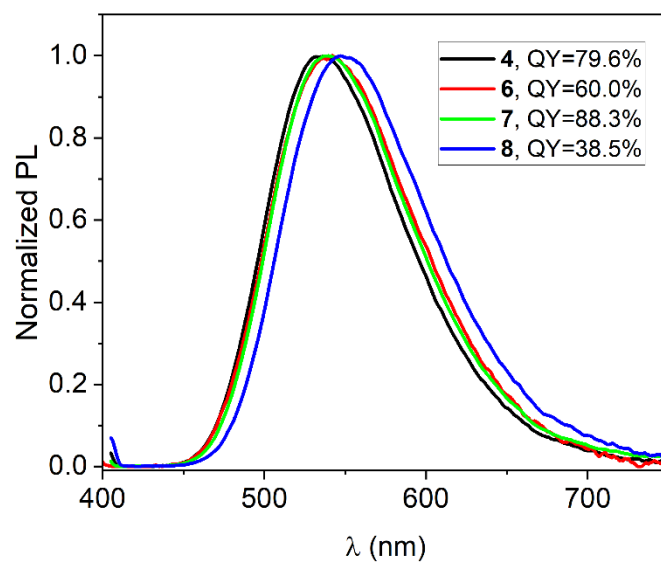

**Fig. S2.** PL spectra and quantum yield of fluorescence of the precursors **4**, **6**, **7** and **8**.



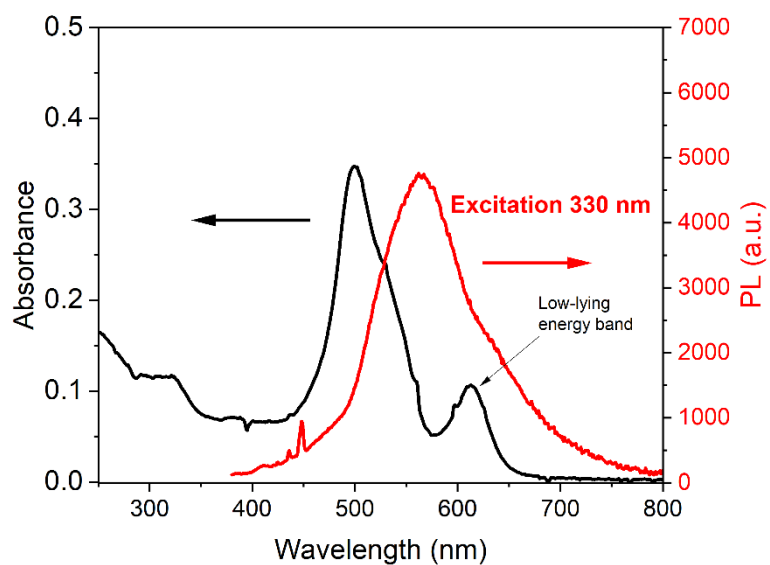

**Fig. S3.** Superimposed emission and absorption spectra of the thienyl-BTD-*carbo*-benzene **2** in chloroform solution, showing anomalous photoluminescence. The solution is highly diluted to reduce the internal effect (molecular reabsorption of emission). Due to the weak emission the excitation slit is quite open inducing the detection of straight light on the detector (see spurious spikes at approximately 450 nm)

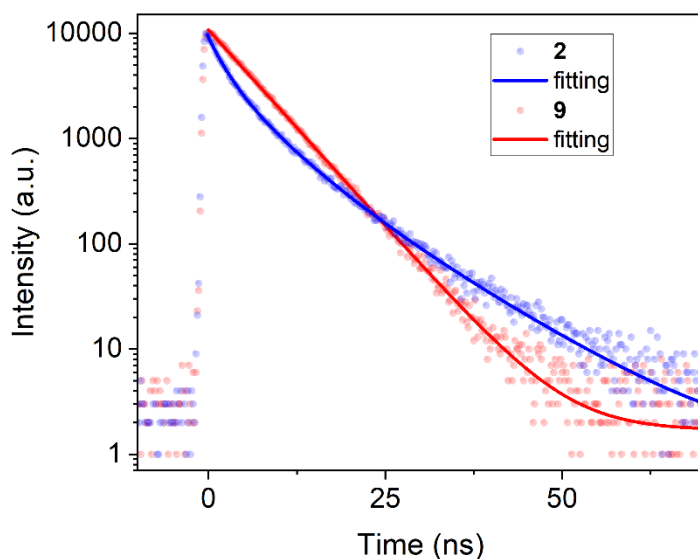

**Fig. S4.** Fitted data of PL decay measured by TCSPC.

**Table S1.** Fitting parameters for the PL decay obtained by TCSPC.

$$I(t) = A_1 e^{-t/\tau_1} + A_2 e^{-t/\tau_2} + A_3 e^{-t/\tau_3} + \dots$$

|          |       | parent bz <b>9</b> |          | cbz <b>2</b> |         |
|----------|-------|--------------------|----------|--------------|---------|
| $\tau_1$ | $A_1$ | 5.82 ns            | 11190.70 | 2.07 ns      | 5318.78 |
| $\tau_2$ | $A_2$ |                    |          | 5.44 ns      | 3790.37 |
| $\tau_3$ | $A_3$ |                    |          | 10.88 ns     | 1230.24 |

Average lifetime :

$$\langle \tau \rangle = \frac{\sum_i A_i \tau_i^2}{\sum_i A_i \tau_i}$$

### 3- DFT calculations

#### 3.1. Computational methods for geometry optimization

Static DFT calculations have been performed at the GGA level with the program Firefly v. 8.1.1,<sup>[1]</sup> using the B3PW91 functional of Becke, Perdew and Wang.<sup>[2]</sup> with the 6-31G(d,p) basis set for H, C, and S atoms.<sup>[3]</sup>

Geometry optimizations of truncated models of the *carbo*-benzene ("cbz") **2**, benzenic parent ("bz") **9**, and their respective radical cations (**2<sup>+</sup>**, **9<sup>+</sup>**) and anions (**2<sup>-</sup>**, **9<sup>-</sup>**) were carried out under  $C_i$  symmetry constraint, the characterization of the equilibrium stationary points being performed by analytical frequency calculations. Total energies are given without zero-point correction.

Molecular orbitals and electron density maps (Table S3 and Fig. S5) were edited using the interface program MacMolPlt, v. 7.7.<sup>[4]</sup>

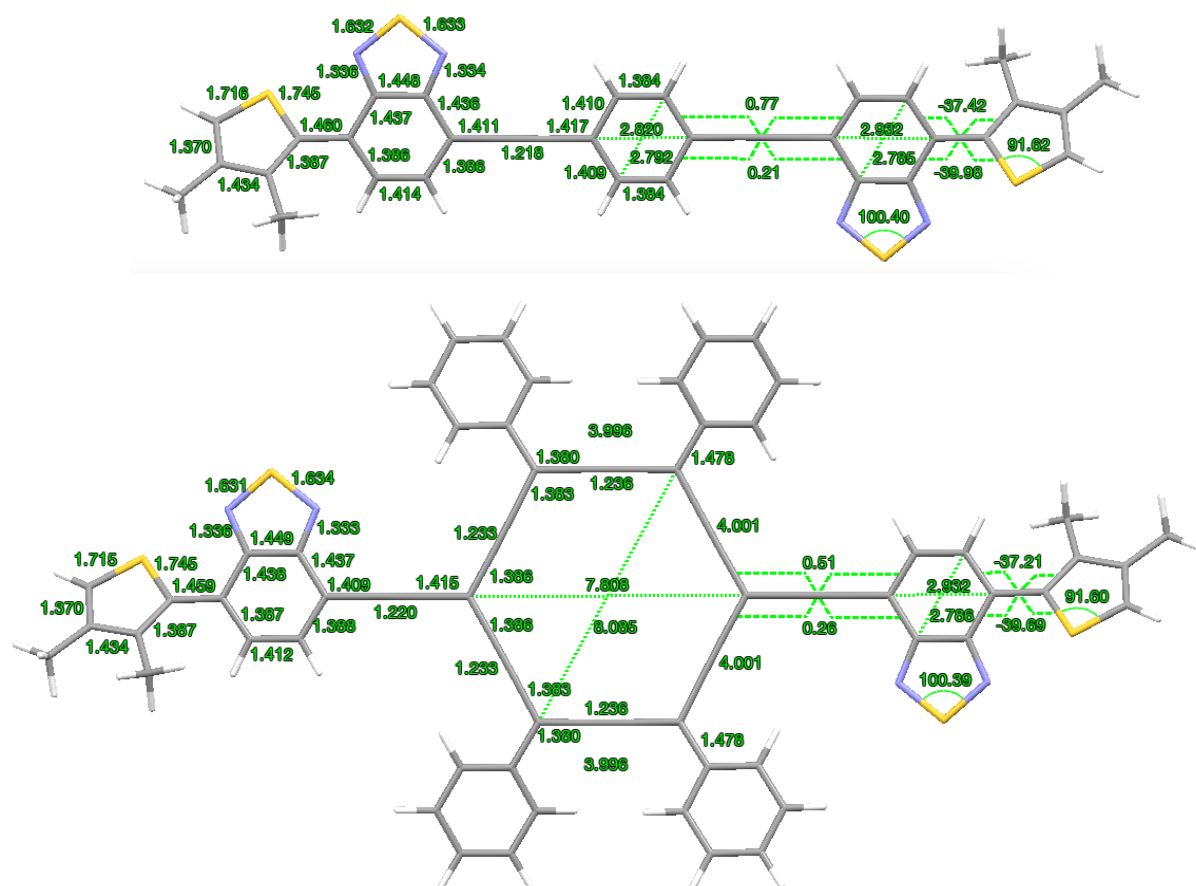

**Fig. S5.** Geometrical data of the calculated equilibrium structure of **2** (bottom) and **9** (top). Bond lengths in Å, dihedral bond angles in degrees.

- 1 a) A. A. Granovsky, *Firefly version 8*, <http://classic.chem.msu.su:gran:firefly:index.html>) which is partially based on the GAMESS (US) source code; b) M. W. Schmidt, K. K. Baldridge, J. A. Boatz, S. T. Elbert, M. S. Gordon, J. H. Jensen, S. Koseki, N. Matsunaga, K. A. Nguyen, S. Su, T. L. Windus, M. Dupuis and J. A. Montgomery, *J. Comput. Chem.* 1993, **14**, 1347-1363.
- 2 (a) A. D. Becke, *J. Chem. Phys.* 1993, **98**, 5648-5652. (b) J. P. Perdew and Y. Wang, *Phys. Rev. B*, 1992, **45**, 13244-13249.
- 3 (a) R. Ditchfield, W. J. Hehre and J. A. Pople, *J. Chem. Phys.* 1971, **54**, 724. (b) T. Clark, J. Chandrasekhar, G. W. Spitznagel and P. v. R. Schleyer, *J. Comp. Chem.* 1983, **4**, 294-301.
- 4 B. M. Bode and M. S. J. Gordon, *J. Mol. Graphics and Modeling* 1998, **16**, 133-138.

### 3.2. Chemical potential, hardness and electrophilicity

According to conceptual DFT,<sup>[5]</sup> the chemical potential  $\mu$  of a  $N$ -electron system of total electronic energy  $E$  is defined as the first derivative of  $E$  vs  $N$  at a fixed external (nuclear) potential  $v$ :  $\mu = (\partial E/\partial N)_v$ ; it is identified to the negative of electronegativity  $\chi$  ( $\mu = -\chi$ ). The molecular hardness  $\eta$  is defined as the corresponding second derivative:<sup>[6]</sup>  $\eta = (\partial^2 E/\partial N^2)_v$  (on the basis of the Taylor expansion of  $E$  vs  $n$ , a factor 1/2 was originally proposed in the alternative definition  $\eta' = 1/2 (\partial^2 E/\partial N^2)_v$ ).<sup>[7]</sup> In numerical applications,  $\mu$  (the Fermi level) and  $\eta$  (the HOMO-LUMO gap) are calculated by finite difference formulas, which, at the first order, are equivalent to the Pearson's definition of electronegativity and twice the hardness, within the Koopmans' approximation for ionization potential and electron affinity:<sup>[8]</sup>

$$\mu \equiv \left(\frac{\partial E}{\partial N}\right)_v \cong \frac{1}{2}(\varepsilon_L + \varepsilon_H), \quad \eta \equiv \left(\frac{\partial^2 E}{\partial N^2}\right)_v \cong \varepsilon_L - \varepsilon_H$$

where  $\varepsilon_H$  and  $\varepsilon_L$  denote the energies of the highest occupied molecular orbital (HOMO) and lowest unoccupied molecular orbital (LUMO), respectively.

Electrophilicity  $\omega$  is the ratio of the chemical potential squared to twice the hardness; a principle of electrophilicity equalization of the constituting atoms within a molecule has been proposed:<sup>[9]</sup>

$$\omega = \frac{\mu^2}{2\eta}$$

Results are listed in Table S2.

**Table S2.** HOMO, LUMO and electronic indices in the Koopmans' approximation (energies in Hartree).

| Energies<br>in a.u.                      | HOMO<br>(possibly<br>SOMO) | LUMO or<br>SOMO for<br>radicals | chemical potential<br>$\mu$<br>(Pearson value) | chemical hardness<br>$\eta$<br>(Pearson value) | electrophilicity<br>$\omega$ |
|------------------------------------------|----------------------------|---------------------------------|------------------------------------------------|------------------------------------------------|------------------------------|
|                                          | $\varepsilon_H$            | $\varepsilon_L$                 |                                                |                                                |                              |
| parent bz <b>9</b>                       | -0.2951                    | -0.1951                         | -0.2451<br>(-0.1482)                           | 0.1000<br>(0.0786)                             | 0.3004<br>(0.140)            |
| parent bz<br>cation <b>9<sup>+</sup></b> | -0.2863                    | -0.2863                         | -0.2863                                        | 0                                              | -                            |
| parent bz<br>anion <b>9<sup>-</sup></b>  | -0.0372                    | -0.0372                         | -0.0372                                        | 0                                              | -                            |
| cbz <b>2</b>                             | -0.1897                    | -0.1206                         | -0.1551<br>(-0.1544)                           | 0.0691<br>(0.0659)                             | 0.1742<br>(0.181)            |
| cbz cation <b>2<sup>+</sup></b>          | -0.2649                    | -0.2649                         | -0.2649                                        | 0                                              | -                            |
| cbz anion <b>2<sup>-</sup></b>           | -0.0693                    | -0.0693                         | -0.0693                                        | 0                                              | -                            |

<sup>5</sup> R. G. Parr, L. von Szentpaly and S. Liu, *J. Am. Chem. Soc.* 1999, **121**, 1922-1924

<sup>6</sup> P. Geerlings, F. De Proft and W. Langenaeker, *Chem. Rev.* 2003, **103**, 1793-1873

<sup>7</sup> a) R. G. Parr and W. Yang, *Density Functional Theory of Atoms and Molecules*, Oxford University Press: New York, 1989; b) R. G. Parr, R. A. Donnelly, M. Levy and W. E. Palke, *J. Chem. Phys.* 1978, **68**, 3801-3807; c) R. G. Parr and R. G. Pearson, *J. Am. Chem. Soc.* 1983, **105**, 7512-7516.

<sup>8</sup> T. Koopmans, *Physica* 1934, **1**, 104-113.

<sup>9</sup> P. K. Chattaraj, S. Giri and S. Duley, *J. Chem. Phys. Lett.* 2010, **1**, 1064-1067.

### 3.4. Frontier orbitals of the neutral molecules

Eigenvalues and spatial distributions of the HOMO and LUMO are listed in Table S3.

**Table S3.** Frontier molecular orbitals, HOMO and LUMO, of **2** and **9** (energies in a.u.).

|      | parent bz <b>9</b>                                                                | cbz <b>2</b>                                                                       |
|------|-----------------------------------------------------------------------------------|------------------------------------------------------------------------------------|
| LUMO | 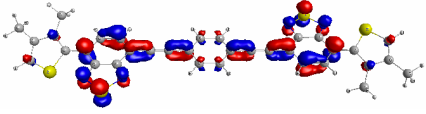 |  |
|      | $E(\text{LUMO, no 160, Au}) = -0.1951 \text{ au}$                                 | $E(\text{LUMO, no 276, Ag}) = -0.1206 \text{ au}$                                  |
| HOMO |  |  |
|      | $E(\text{HOMO, no 159, Ag}) = -0.2951 \text{ au}$                                 | $E(\text{HOMO, no 275, Au}) = -0.1897 \text{ au}$                                  |

### 3.3. Adiabatic ionization energy and electron affinity in the Koopman's approximation

#### 3.3.1. Adiabatic ionisation energy

$$IE(\mathbf{9}) = E(\mathbf{9}^+) - E(\mathbf{9}) = -3119.53271 - (-3119.75946) = 0.22675 \text{ au}$$

$$IE(\mathbf{2}) = E(\mathbf{2}^+) - E(\mathbf{2}) = -4500.1185511063 - (-4500.3325115314) = 0.21396 \text{ au}$$

#### 3.3.2. Adiabatic electron affinity

$$EA(\mathbf{9}) = -[E(\mathbf{9}^-) - E(\mathbf{9})] = -[-3119.82902 - (-3119.75946)] = 0.06957 \text{ au}$$

$$EA(\mathbf{2}) = -[E(\mathbf{2}^-) - E(\mathbf{2})] = -[-4500.4273744738 - (-4500.3325115314)] = 0.09486 \text{ au}$$

### 3.4 Electron density and molecular electrostatic potential

As shown in Fig. S6, the electron density of **2** and **9** concentrates in the vicinity of the formal triple bonds of the Lewis structures while the MESP becomes more negative, as expected ( $sp$ -hybridized C atoms are indeed generally considered as more electronegative). The S atoms of the thiophene and BTB rings appear with the same electronegativity, as expected as well.

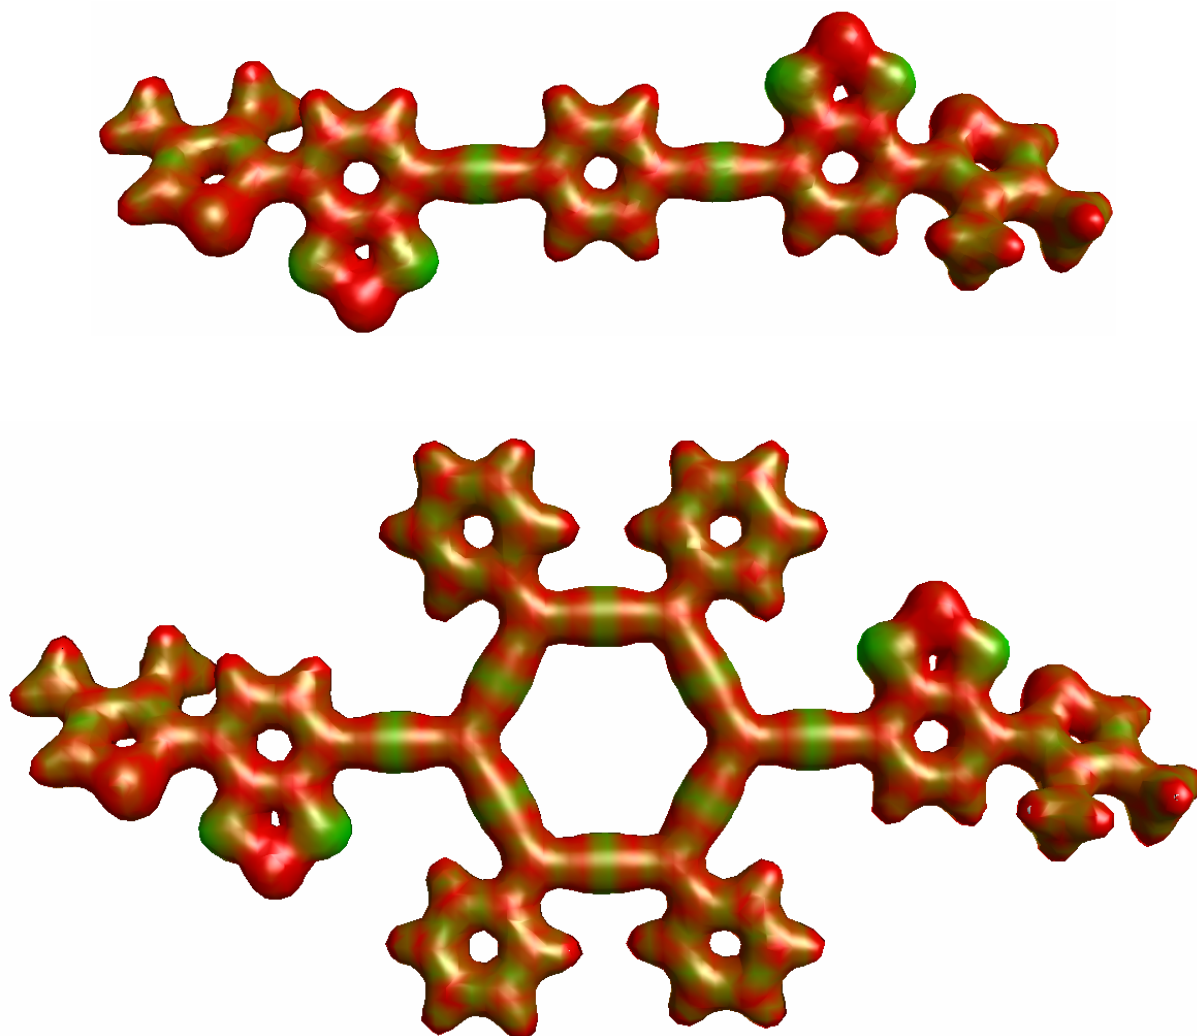

**Fig. S6.** Electron density map of **2** (*bottom*) and **9** (*top*), contour value = 0.07; color code: proportional to the molecular electrostatic potential, negative  $\rightarrow$  green, positive  $\rightarrow$  red (maximum MESP value mapped: 0.30 au).

### 3.5. Cartesian coordinates and total energy in the calculated equilibrium geometry in the gas phase

|                                                         | x    | y             | z              |               |
|---------------------------------------------------------|------|---------------|----------------|---------------|
| parent bz <b>9</b> ( $C_i$ symmetry)                    |      |               |                |               |
| NUCLEAR ENERGY = 4442.8837025802                        |      |               |                |               |
| ELECTRONIC ENERGY = -7562.6431586706                    |      |               |                |               |
| TOTAL ENERGY = -3119.7594560904                         |      |               |                |               |
| C                                                       | 6.0  | 1.3454276232  | -0.0625198059  | -0.3696944212 |
| C                                                       | 6.0  | 0.6777919848  | -1.2357273453  | 0.0361559449  |
| C                                                       | 6.0  | -0.6797281701 | -1.1500916289  | 0.4051080675  |
| H                                                       | 1.0  | 2.3907112824  | -0.1233402695  | -0.6545489047 |
| H                                                       | 1.0  | -1.2003805866 | -2.0490430980  | 0.7189654801  |
| C                                                       | 6.0  | 1.9715764388  | -3.5306434236  | 0.0943996553  |
| C                                                       | 6.0  | 1.3644822832  | -2.4746082083  | 0.0706920293  |
| C                                                       | 6.0  | 2.0916093363  | -5.9441563582  | 0.5283129118  |
| C                                                       | 6.0  | 2.7991016951  | -7.1674663540  | 0.5719326244  |
| C                                                       | 6.0  | 4.1272482546  | -7.2994974759  | 0.1972147696  |
| C                                                       | 6.0  | 4.7733911475  | -6.0854199595  | -0.2206295582 |
| C                                                       | 6.0  | 4.0583484707  | -4.8263400701  | -0.2568962818 |
| C                                                       | 6.0  | 2.6755073219  | -4.7536246303  | 0.1246424998  |
| H                                                       | 1.0  | 1.0521900119  | -5.9327083070  | 0.8404748821  |
| H                                                       | 1.0  | 2.2765361368  | -8.0397847015  | 0.9488495471  |
| N                                                       | 7.0  | 6.0457082967  | -5.9759372906  | -0.6128116181 |
| N                                                       | 7.0  | 4.8013981604  | -3.7984789414  | -0.6695066489 |
| S                                                       | 16.0 | 6.2857799749  | -4.4042909997  | -0.9809291709 |
| S                                                       | 16.0 | 6.4680072075  | -8.6904885506  | 0.7997767878  |
| C                                                       | 6.0  | 6.4568253511  | -10.4001767103 | 0.6587802810  |
| C                                                       | 6.0  | 4.8189963034  | -8.5840919583  | 0.2390777058  |
| C                                                       | 6.0  | 5.2700211662  | -10.8855075614 | 0.1771032418  |
| C                                                       | 6.0  | 4.3188772226  | -9.8405534970  | -0.0675092156 |
| C                                                       | 6.0  | 4.9999891045  | -12.3387090183 | -0.0792942036 |
| C                                                       | 6.0  | 2.9654065654  | -10.1227986066 | -0.6524484356 |
| H                                                       | 1.0  | 7.3405591602  | -10.9682401944 | 0.9195138006  |
| H                                                       | 1.0  | 5.8479214958  | -12.9556520267 | 0.2282065381  |
| H                                                       | 1.0  | 4.1165366684  | -12.6883717684 | 0.4669500065  |
| H                                                       | 1.0  | 4.8178938249  | -12.5336783506 | -1.1429701636 |
| H                                                       | 1.0  | 3.0382320670  | -10.8821415542 | -1.4380191477 |
| H                                                       | 1.0  | 2.5185071868  | -9.2285335117  | -1.0918610384 |
| H                                                       | 1.0  | 2.2653040202  | -10.5116950559 | 0.0982735987  |
| parent bz cation <b>9<sup>+</sup></b> ( $C_i$ symmetry) |      |               |                |               |
| NUCLEAR ENERGY = 4453.4040361728                        |      |               |                |               |
| ELECTRONIC ENERGY = -7572.9367436295                    |      |               |                |               |
| TOTAL ENERGY = -3119.5327074567                         |      |               |                |               |
| C                                                       | 6.0  | 1.3684154088  | -0.0476401538  | -0.3075267797 |
| C                                                       | 6.0  | 0.6719706164  | -1.2351265532  | 0.0362916855  |
| C                                                       | 6.0  | -0.7106082334 | -1.1602596723  | 0.3437534780  |
| H                                                       | 1.0  | 2.4255811866  | -0.1079850879  | -0.5426580339 |
| H                                                       | 1.0  | -1.2430353335 | -2.0673196567  | 0.6092094760  |
| C                                                       | 6.0  | 1.9566920309  | -3.5240339680  | 0.0804088075  |
| C                                                       | 6.0  | 1.3469422655  | -2.4605675242  | 0.0652812855  |
| C                                                       | 6.0  | 2.0481734630  | -5.9532354195  | 0.3775298940  |
| C                                                       | 6.0  | 2.7442240420  | -7.1653999895  | 0.3885367739  |

|                                                   |      |               |                |               |
|---------------------------------------------------|------|---------------|----------------|---------------|
| C                                                 | 6.0  | 4.1156098471  | -7.2774125660  | 0.1117792848  |
| C                                                 | 6.0  | 4.7857179551  | -6.0281574579  | -0.1651371103 |
| C                                                 | 6.0  | 4.0719825754  | -4.7736293287  | -0.1829205853 |
| C                                                 | 6.0  | 2.6608546393  | -4.7271883844  | 0.0910352894  |
| H                                                 | 1.0  | 0.9896804445  | -5.9574432523  | 0.6163027042  |
| H                                                 | 1.0  | 2.1940036880  | -8.0531782897  | 0.6709004094  |
| N                                                 | 7.0  | 6.0822793872  | -5.8910599960  | -0.4408065421 |
| N                                                 | 7.0  | 4.8382780780  | -3.7225722820  | -0.4655740375 |
| S                                                 | 16.0 | 6.3494557292  | -4.3009848709  | -0.6877611809 |
| S                                                 | 16.0 | 6.5190572781  | -8.6152888352  | 0.4990612243  |
| C                                                 | 6.0  | 6.4909178591  | -10.3205442685 | 0.4530216306  |
| C                                                 | 6.0  | 4.8060795547  | -8.5393621037  | 0.1332665243  |
| C                                                 | 6.0  | 5.2586706594  | -10.8457505933 | 0.1255964783  |
| C                                                 | 6.0  | 4.2829595668  | -9.8291037806  | -0.0623978898 |
| C                                                 | 6.0  | 4.9941669513  | -12.3139272923 | -0.0238395807 |
| C                                                 | 6.0  | 2.8863361061  | -10.1578739527 | -0.4992567930 |
| H                                                 | 1.0  | 7.3986619638  | -10.8757694518 | 0.6546191241  |
| H                                                 | 1.0  | 5.8792353524  | -12.8996437732 | 0.2333872863  |
| H                                                 | 1.0  | 4.1747925724  | -12.6427943825 | 0.6238221047  |
| H                                                 | 1.0  | 4.7183533909  | -12.5680029745 | -1.0538814212 |
| H                                                 | 1.0  | 2.8831472605  | -11.0763463936 | -1.0916582169 |
| H                                                 | 1.0  | 2.4487046732  | -9.3661460300  | -1.1114512064 |
| H                                                 | 1.0  | 2.2201649814  | -10.3332970417 | 0.3555071250  |
| parent bz anion $\mathcal{P}^-$ ( $C_i$ symmetry) |      |               |                |               |
| NUCLEAR ENERGY = 4437.7645186617                  |      |               |                |               |
| ELECTRONIC ENERGY = -7557.5935407721              |      |               |                |               |
| TOTAL ENERGY = -3119.8290221104                   |      |               |                |               |
| C                                                 | 6.0  | 1.3445100980  | -0.0487893300  | -0.3725861540 |
| C                                                 | 6.0  | 0.6941308989  | -1.2396846257  | 0.0353845047  |
| C                                                 | 6.0  | -0.6703687128 | -1.1537787966  | 0.4072214867  |
| H                                                 | 1.0  | 2.3903797242  | -0.1003278376  | -0.6591971254 |
| H                                                 | 1.0  | -1.1836465110 | -2.0567012088  | 0.7242008353  |
| C                                                 | 6.0  | 2.0111511088  | -3.5156592309  | 0.0872810822  |
| C                                                 | 6.0  | 1.3863327670  | -2.4619708151  | 0.0675342381  |
| C                                                 | 6.0  | 2.1119375557  | -5.9334351392  | 0.5152116400  |
| C                                                 | 6.0  | 2.8093006704  | -7.1452032279  | 0.5498091101  |
| C                                                 | 6.0  | 4.1528158033  | -7.2795267904  | 0.1801174332  |
| C                                                 | 6.0  | 4.8144279469  | -6.0697226605  | -0.2084183333 |
| C                                                 | 6.0  | 4.1009368213  | -4.8014516119  | -0.2461953889 |
| C                                                 | 6.0  | 2.7102872961  | -4.7280649496  | 0.1175060314  |
| H                                                 | 1.0  | 1.0707538202  | -5.9142656518  | 0.8217259964  |
| H                                                 | 1.0  | 2.2845486155  | -8.0224823901  | 0.9140301377  |
| N                                                 | 7.0  | 6.0974935424  | -5.9650900947  | -0.5675050618 |
| N                                                 | 7.0  | 4.8502264140  | -3.7712694133  | -0.6334126879 |
| S                                                 | 16.0 | 6.3563607245  | -4.3755937199  | -0.9207442691 |
| S                                                 | 16.0 | 6.4929265611  | -8.7006132409  | 0.7449670885  |
| C                                                 | 6.0  | 6.4568190465  | -10.4163459390 | 0.6269671521  |
| C                                                 | 6.0  | 4.8299388748  | -8.5704079129  | 0.2146145305  |
| C                                                 | 6.0  | 5.2522425408  | -10.8843618262 | 0.1761626361  |
| C                                                 | 6.0  | 4.3143189917  | -9.8269528768  | -0.0701207847 |
| C                                                 | 6.0  | 4.9521039909  | -12.3364864930 | -0.0549869642 |
| C                                                 | 6.0  | 2.9520370312  | -10.0903131816 | -0.6454841191 |
| H                                                 | 1.0  | 7.3409148330  | -10.9957092356 | 0.8611228437  |
| H                                                 | 1.0  | 5.8082068902  | -12.9620467237 | 0.2131407248  |
| H                                                 | 1.0  | 4.0937958590  | -12.6730757836 | 0.5392465021  |
| H                                                 | 1.0  | 4.7096624371  | -12.5396126956 | -1.1058065765 |



|                                       |      |                |                |               |
|---------------------------------------|------|----------------|----------------|---------------|
| H                                     | 1.0  | 3.0008037151   | -10.8707959239 | -1.4135100107 |
| H                                     | 1.0  | 2.5355782597   | -9.1912053307  | -1.1051058682 |
| H                                     | 1.0  | 2.2350267198   | -10.4368786380 | 0.1110712288  |
| cbz 2 (C <sub>i</sub> symmetry)       |      |                |                |               |
| NUCLEAR ENERGY = 10629.0845827841     |      |                |                |               |
| ELECTRONIC ENERGY = -15129.4170943155 |      |                |                |               |
| TOTAL ENERGY = -4500.3325115314       |      |                |                |               |
| C                                     | 6.0  | -3.9014881553  | 0.1379792219   | -0.0223047453 |
| C                                     | 6.0  | -3.1801758565  | 1.3214779018   | -0.0229774077 |
| C                                     | 6.0  | -2.5549527222  | 2.3842341656   | -0.0085336691 |
| C                                     | 6.0  | -1.8691428285  | 3.5843857269   | 0.0243895744  |
| C                                     | 6.0  | -0.4899173360  | 3.5503991612   | 0.0102409551  |
| C                                     | 6.0  | -0.7452203142  | -3.5091239436  | 0.0181586564  |
| C                                     | 6.0  | -2.1235438317  | -3.4453493105  | 0.0330065771  |
| C                                     | 6.0  | -2.7174103096  | -2.1971986313  | 0.0001481775  |
| C                                     | 6.0  | -3.2620421769  | -1.0914045934  | -0.0180969433 |
| C                                     | 6.0  | -2.6021153907  | 4.8670817080   | 0.0728159610  |
| C                                     | 6.0  | -3.9846767431  | 4.9099934190   | -0.1647870897 |
| C                                     | 6.0  | -4.6692594623  | 6.1187624877   | -0.1240450314 |
| C                                     | 6.0  | -3.9906804949  | 7.3043163224   | 0.1583610157  |
| C                                     | 6.0  | -2.6182061150  | 7.2698520674   | 0.4045277603  |
| C                                     | 6.0  | -1.9292241586  | 6.0636657705   | 0.3635240278  |
| C                                     | 6.0  | -2.9495406780  | -4.6697594329  | 0.0790984644  |
| C                                     | 6.0  | -2.3616741851  | -5.9177486922  | 0.3378527000  |
| C                                     | 6.0  | -3.1375354613  | -7.0699613130  | 0.3747258183  |
| C                                     | 6.0  | -4.5132717181  | -6.9975815700  | 0.1557128718  |
| C                                     | 6.0  | -5.1068653993  | -5.7602768878  | -0.0936704501 |
| C                                     | 6.0  | -4.3362360213  | -4.6042766967  | -0.1296991207 |
| H                                     | 1.0  | -4.5132827117  | 3.9880036388   | -0.3872018528 |
| H                                     | 1.0  | -5.7383611019  | 6.1367130369   | -0.3162146416 |
| H                                     | 1.0  | -4.5281483980  | 8.2476268961   | 0.1902757558  |
| H                                     | 1.0  | -2.0827593978  | 8.1862911068   | 0.6356439963  |
| H                                     | 1.0  | -1.2942964987  | -5.9720656709  | 0.5291584981  |
| H                                     | 1.0  | -2.6678442919  | -8.0274867801  | 0.5814552756  |
| H                                     | 1.0  | -5.1189784580  | -7.8988752696  | 0.1840715340  |
| H                                     | 1.0  | -4.8059494981  | -3.6445443050  | -0.3223952171 |
| H                                     | 1.0  | -0.8650197595  | 6.0351077734   | 0.5763911462  |
| H                                     | 1.0  | -6.1775614419  | -5.6932622166  | -0.2629161181 |
| C                                     | 6.0  | -6.5356431840  | 0.2111927812   | -0.0071137565 |
| C                                     | 6.0  | -5.3162267249  | 0.1826450621   | -0.0126180703 |
| C                                     | 6.0  | -8.6452560080  | 1.4584670602   | 0.0273189834  |
| C                                     | 6.0  | -10.0559784858 | 1.5180203400   | 0.0600135025  |
| C                                     | 6.0  | -10.8718823628 | 0.3962335675   | 0.0553888510  |
| C                                     | 6.0  | -10.1838900693 | -0.8660279563  | 0.0420230095  |
| C                                     | 6.0  | -8.7371950925  | -0.9361966884  | 0.0164189544  |
| C                                     | 6.0  | -7.9434209680  | 0.2614155194   | 0.0072032501  |
| H                                     | 1.0  | -8.0844882840  | 2.3874804826   | 0.0375714655  |
| H                                     | 1.0  | -10.5185866110 | 2.4966282348   | 0.1246631885  |
| N                                     | 7.0  | -10.7657520330 | -2.0683487305  | 0.0427389984  |
| N                                     | 7.0  | -8.2603210369  | -2.1813535704  | 0.0006824136  |
| S                                     | 16.0 | -9.5617159668  | -3.1688268240  | 0.0197723388  |
| S                                     | 16.0 | -13.2856451492 | -0.5936960613  | 1.0403003597  |
| C                                     | 6.0  | -14.7319696972 | 0.2266416122   | 0.6190827868  |
| C                                     | 6.0  | -12.3269550308 | 0.4986116616   | 0.0742189908  |
| C                                     | 6.0  | -14.5199880600 | 1.2692042723   | -0.2439424618 |
| C                                     | 6.0  | -13.1315406147 | 1.4321980940   | -0.5624044862 |
| C                                     | 6.0  | -15.6135105085 | 2.1303726334   | -0.8033395238 |
| C                                     | 6.0  | -12.6592410903 | 2.4731427532   | -1.5354068123 |

|                                                     |      |                |               |               |
|-----------------------------------------------------|------|----------------|---------------|---------------|
| H                                                   | 1.0  | -15.6798995250 | -0.1147015178 | 1.0148117251  |
| H                                                   | 1.0  | -16.5865572496 | 1.8407526908  | -0.3990189009 |
| H                                                   | 1.0  | -15.4550077619 | 3.1890524890  | -0.5679988894 |
| H                                                   | 1.0  | -15.6718464151 | 2.0491304783  | -1.8954160655 |
| H                                                   | 1.0  | -13.3488055784 | 2.5467743043  | -2.3826881653 |
| H                                                   | 1.0  | -11.6682933499 | 2.2402579665  | -1.9306690987 |
| H                                                   | 1.0  | -12.6117013158 | 3.4706738584  | -1.0797961280 |
| cbz cation 2 <sup>+</sup> (C <sub>i</sub> symmetry) |      |                |               |               |
| NUCLEAR ENERGY = 10643.6116516403                   |      |                |               |               |
| ELECTRONIC ENERGY = -15143.7302027466               |      |                |               |               |
| TOTAL ENERGY = -4500.1185511063                     |      |                |               |               |
| C                                                   | 6.0  | -3.8929772370  | 0.1489127445  | -0.0205329789 |
| C                                                   | 6.0  | -3.1675448068  | 1.3367383831  | -0.0265682631 |
| C                                                   | 6.0  | -2.5458827129  | 2.3972265240  | -0.0128004502 |
| C                                                   | 6.0  | -1.8566912341  | 3.6062759135  | 0.0214956904  |
| C                                                   | 6.0  | -0.4853441715  | 3.5562401534  | 0.0060868872  |
| C                                                   | 6.0  | -0.7532469556  | -3.5114809227 | 0.0248390606  |
| C                                                   | 6.0  | -2.1239101404  | -3.4550204906 | 0.0450495499  |
| C                                                   | 6.0  | -2.7143651064  | -2.1927749527 | 0.0124487243  |
| C                                                   | 6.0  | -3.2501797902  | -1.0879614121 | -0.0080717535 |
| C                                                   | 6.0  | -2.5868242884  | 4.8864147139  | 0.0728861452  |
| C                                                   | 6.0  | -3.9640361120  | 4.9335898751  | -0.1952157185 |
| C                                                   | 6.0  | -4.6463516548  | 6.1431804371  | -0.1523686116 |
| C                                                   | 6.0  | -3.9701968561  | 7.3215121328  | 0.1641938955  |
| C                                                   | 6.0  | -2.6031988322  | 7.2820626244  | 0.4417195090  |
| C                                                   | 6.0  | -1.9157869949  | 6.0763709422  | 0.3969910262  |
| C                                                   | 6.0  | -2.9548027254  | -4.6698863225 | 0.0944683870  |
| C                                                   | 6.0  | -2.3689879713  | -5.9230872535 | 0.3396920261  |
| C                                                   | 6.0  | -3.1508228265  | -7.0693901411 | 0.3767119491  |
| C                                                   | 6.0  | -4.5289182749  | -6.9854259351 | 0.1707451293  |
| C                                                   | 6.0  | -5.1197860427  | -5.7440542839 | -0.0643214713 |
| C                                                   | 6.0  | -4.3439165123  | -4.5922548230 | -0.0994883456 |
| H                                                   | 1.0  | -4.4897930673  | 4.0174974225  | -0.4461255694 |
| H                                                   | 1.0  | -5.7102019844  | 6.1687219754  | -0.3689519783 |
| H                                                   | 1.0  | -4.5059672643  | 8.2653028624  | 0.1989991254  |
| H                                                   | 1.0  | -2.0735185204  | 8.1938599920  | 0.7008841256  |
| H                                                   | 1.0  | -1.3005613136  | -5.9860150193 | 0.5214018504  |
| H                                                   | 1.0  | -2.6870610328  | -8.0313570099 | 0.5730978083  |
| H                                                   | 1.0  | -5.1387457844  | -7.8834613558 | 0.1988478626  |
| H                                                   | 1.0  | -4.8110659698  | -3.6293198034 | -0.2814502289 |
| H                                                   | 1.0  | -0.8573593181  | 6.0432491174  | 0.6360607024  |
| H                                                   | 1.0  | -6.1914550444  | -5.6723424242 | -0.2224890642 |
| C                                                   | 6.0  | -6.5173369629  | 0.2113188741  | -0.0154824170 |
| C                                                   | 6.0  | -5.2917300282  | 0.1899784867  | -0.0166262568 |
| C                                                   | 6.0  | -8.6278396965  | 1.4442577770  | -0.0604572422 |
| C                                                   | 6.0  | -10.0284322343 | 1.4974102093  | -0.0505396095 |
| C                                                   | 6.0  | -10.8442385209 | 0.3633417312  | 0.0021303110  |
| C                                                   | 6.0  | -10.1416823215 | -0.8943214688 | 0.0726248592  |
| C                                                   | 6.0  | -8.6978345102  | -0.9581357024 | 0.0582262800  |
| C                                                   | 6.0  | -7.9130116057  | 0.2446300634  | -0.0118641923 |
| H                                                   | 1.0  | -8.0710806631  | 2.3752634960  | -0.0892159792 |
| H                                                   | 1.0  | -10.4931553763 | 2.4753216304  | -0.0387490711 |
| N                                                   | 7.0  | -10.7148351139 | -2.0968070289 | 0.1387396850  |
| N                                                   | 7.0  | -8.2136178301  | -2.1972745921 | 0.1163121266  |
| S                                                   | 16.0 | -9.5089358891  | -3.1921616338 | 0.1870539481  |
| S                                                   | 16.0 | -13.2507224427 | -0.7205248918 | 0.8792004514  |
| C                                                   | 6.0  | -14.6871700563 | 0.1328425628  | 0.5192406536  |
| C                                                   | 6.0  | -12.2867430489 | 0.4523218958  | 0.0095487716  |

|                                                    |     |                |               |               |
|----------------------------------------------------|-----|----------------|---------------|---------------|
| C                                                  | 6.0 | -14.4808938294 | 1.2409810609  | -0.2685375673 |
| C                                                  | 6.0 | -13.0992936366 | 1.4325917944  | -0.5673632324 |
| C                                                  | 6.0 | -15.5828905983 | 2.1303673369  | -0.7622178811 |
| C                                                  | 6.0 | -12.6365062938 | 2.5348211078  | -1.4742443810 |
| H                                                  | 1.0 | -15.6354374186 | -0.2317286861 | 0.8941383348  |
| H                                                  | 1.0 | -16.5482962821 | 1.8190812186  | -0.3570836883 |
| H                                                  | 1.0 | -15.4194074452 | 3.1741582506  | -0.4732430878 |
| H                                                  | 1.0 | -15.6599738790 | 2.1040239894  | -1.8554784491 |
| H                                                  | 1.0 | -13.3830203182 | 2.7246060555  | -2.2508789500 |
| H                                                  | 1.0 | -11.6952371027 | 2.2893997852  | -1.9709387955 |
| H                                                  | 1.0 | -12.4967987573 | 3.4804948893  | -0.9345199115 |
| cbz anion 2 <sup>-</sup> (C <sub>i</sub> symmetry) |     |                |               |               |
| NUCLEAR ENERGY = 10619.2471287644                  |     |                |               |               |
| ELECTRONIC ENERGY = -15119.6745032382              |     |                |               |               |
| TOTAL ENERGY = -4500.4273744738                    |     |                |               |               |
| C                                                  | 6.0 | -3.9378918597  | 0.1481106387  | -0.0161481803 |
| C                                                  | 6.0 | -3.2092730525  | 1.3389830924  | -0.0152289233 |
| C                                                  | 6.0 | -2.5706266637  | 2.3895113060  | -0.0034253997 |
| C                                                  | 6.0 | -1.8638139972  | 3.5907013647  | 0.0275468098  |
| C                                                  | 6.0 | -0.4934187251  | 3.5569739622  | 0.0173939376  |
| C                                                  | 6.0 | -0.7472658054  | -3.5093566226 | 0.0097800916  |
| C                                                  | 6.0 | -2.1159446313  | -3.4311337966 | 0.0289033334  |
| C                                                  | 6.0 | -2.7199849101  | -2.1763319546 | 0.0008926695  |
| C                                                  | 6.0 | -3.2806203484  | -1.0822639902 | -0.0132517720 |
| C                                                  | 6.0 | -2.5965131344  | 4.8739838095  | 0.0701906916  |
| C                                                  | 6.0 | -3.9803456396  | 4.9162448502  | -0.1631505649 |
| C                                                  | 6.0 | -4.6678992917  | 6.1242153265  | -0.1265299508 |
| C                                                  | 6.0 | -3.9933179894  | 7.3138839050  | 0.1471606393  |
| C                                                  | 6.0 | -2.6194941987  | 7.2810828251  | 0.3889985407  |
| C                                                  | 6.0 | -1.9284314402  | 6.0760536273  | 0.3528018453  |
| C                                                  | 6.0 | -2.9558125167  | -4.6473058125 | 0.0793797134  |
| C                                                  | 6.0 | -2.3801107881  | -5.9108427384 | 0.2872223753  |
| C                                                  | 6.0 | -3.1708439508  | -7.0527198235 | 0.3295826408  |
| C                                                  | 6.0 | -4.5538779618  | -6.9581624869 | 0.1697503333  |
| C                                                  | 6.0 | -5.1360030970  | -5.7062835119 | -0.0271522727 |
| C                                                  | 6.0 | -4.3492139454  | -4.5607485379 | -0.0709552871 |
| H                                                  | 1.0 | -4.5066328729  | 3.9907201099  | -0.3765937252 |
| H                                                  | 1.0 | -5.7384237345  | 6.1363601588  | -0.3140422674 |
| H                                                  | 1.0 | -4.5330048938  | 8.2564084864  | 0.1769449516  |
| H                                                  | 1.0 | -2.0837175459  | 8.1994143866  | 0.6147450948  |
| H                                                  | 1.0 | -1.3065801006  | -5.9832497465 | 0.4334330883  |
| H                                                  | 1.0 | -2.7057730786  | -8.0211103218 | 0.4951577637  |
| H                                                  | 1.0 | -5.1718579311  | -7.8513582667 | 0.2042742260  |
| H                                                  | 1.0 | -4.8115598278  | -3.5899094401 | -0.2213122026 |
| H                                                  | 1.0 | -0.8635035212  | 6.0495163207  | 0.5633254800  |
| H                                                  | 1.0 | -6.2120624191  | -5.6164774086 | -0.1472729109 |
| C                                                  | 6.0 | -6.5661088459  | 0.1977389777  | 0.0009302283  |
| C                                                  | 6.0 | -5.3405051952  | 0.1824696910  | -0.0057212483 |
| C                                                  | 6.0 | -8.6775047086  | 1.4457445968  | 0.0512062855  |
| C                                                  | 6.0 | -10.0824558569 | 1.4940220718  | 0.0751570715  |
| C                                                  | 6.0 | -10.8998462879 | 0.3676394340  | 0.0472305447  |
| C                                                  | 6.0 | -10.2119890756 | -0.8912693849 | 0.0273217429  |
| C                                                  | 6.0 | -8.7606575365  | -0.9556317289 | 0.0087431874  |
| C                                                  | 6.0 | -7.9637474880  | 0.2457010188  | 0.0151551318  |
| H                                                  | 1.0 | -8.1195031349  | 2.3758929062  | 0.0793990842  |
| H                                                  | 1.0 | -10.5516725612 | 2.4697792036  | 0.1491950861  |
| N                                                  | 7.0 | -10.7902218440 | -2.0957700711 | 0.0202777910  |

|   |      |                |               |               |  |
|---|------|----------------|---------------|---------------|--|
| N | 7.0  | -8.2789968501  | -2.1964371384 | -0.0124628657 |  |
| S | 16.0 | -9.5762732261  | -3.1963666376 | -0.0041978320 |  |
| S | 16.0 | -13.3276344210 | -0.6249907857 | 1.0074778864  |  |
| C | 6.0  | -14.7723216161 | 0.2080368245  | 0.5925847797  |  |
| C | 6.0  | -12.3560586065 | 0.4729668581  | 0.0567260927  |  |
| C | 6.0  | -14.5478578830 | 1.2604424191  | -0.2533493577 |  |
| C | 6.0  | -13.1566416335 | 1.4158137816  | -0.5694449135 |  |
| C | 6.0  | -15.6328138245 | 2.1399267497  | -0.8020491661 |  |
| C | 6.0  | -12.6725601995 | 2.4613426414  | -1.5324597215 |  |
| H | 1.0  | -15.7250573508 | -0.1375095547 | 0.9727597723  |  |
| H | 1.0  | -16.6099209058 | 1.8514655321  | -0.4050782176 |  |
| H | 1.0  | -15.4666230873 | 3.1937590298  | -0.5485549048 |  |
| H | 1.0  | -15.6893784426 | 2.0803851828  | -1.8960586225 |  |
| H | 1.0  | -13.3592172890 | 2.5507501578  | -2.3814207723 |  |
| H | 1.0  | -11.6836784497 | 2.2163621299  | -1.9257968648 |  |
| H | 1.0  | -12.6091186438 | 3.4560073248  | -1.0714814331 |  |
